# Supplementary material for: Evaluation of Athlete Monitoring Tools across 10 Weeks of Elite Youth Basketball Training: An Explorative Study
Source: MDPI journal article supplement (doi:10.3390/sports11020026), 2023-01-25
Supplement: s1 [file s1]

**Table S1.** Subjective load monitoring variables on *OwnUrGoal* across 10 weeks.

| Variable             | Week 1             | Week 2             | Week 3                          | Week 4            | Week 5                                  | Week 6             | Week 7             | Week 8                          | Week 9             | Week 10                                  |
|----------------------|--------------------|--------------------|---------------------------------|-------------------|-----------------------------------------|--------------------|--------------------|---------------------------------|--------------------|------------------------------------------|
| Wellness score       | 12.6<br>(4.8)      | 12.5<br>(4.8)      | 12.4<br>(4.8)                   | 13.1<br>(4.8)     | 12.9<br>(4.5)                           | 13.1<br>(4.8)      | 14.1<br>(4.4)      | 13.1<br>(4.3)                   | 12.7<br>(4.7)      | 12.5<br>(4.8)                            |
| Muscle soreness      | 1.8<br>(0.9)       | 1.9<br>(0.8)       | 1.8<br>(0.9)                    | 2.0<br>(1.1)      | 1.9<br>(1.0)                            | 2.0<br>(1.0)       | 2.0<br>(0.9)       | 2.2<br>(1.0)                    | 1.8<br>(0.9)       | 1.9<br>(1.0)                             |
| Fatigue              | 2.7<br>(1.3)       | 2.9<br>(1.2)       | 2.8<br>(1.4)                    | 3.1<br>(1.3)      | 2.8<br>(1.4)                            | 3.0<br>(1.4)       | 3.2<br>(1.4)       | 3.0<br>(1.1)                    | 2.8<br>(1.2)       | 2.8<br>(1.3)                             |
| Sleep quality        | 2.6<br>(1.0)       | 2.6<br>(0.9)       | 2.6<br>(1.0)                    | 2.9<br>(1.1)      | 2.7<br>(1.2)                            | 2.8<br>(1.3)       | 3.0<br>(1.1)       | 2.9<br>(0.9)                    | 2.7<br>(1.1)       | 2.6<br>(1.1)                             |
| Hours slept          | 8.7<br>(0.9)       | 8.6<br>(0.7)       | 8.7<br>(0.7)                    | 8.5<br>(0.8)      | 8.6<br>(0.9)                            | 8.7<br>(1.2)       | 8.5<br>(0.9)       | 8.5<br>(0.8)                    | 8.6<br>(0.6)       | <b>8.9<sup>cef</sup></b><br>(0.7)        |
| Stress               | 2.9<br>(1.2)       | 2.7<br>(1.3)       | <b>2.6<sup>e</sup></b><br>(1.1) | 2.7<br>(1.1)      | 2.9<br>(1.3)                            | 2.8<br>(1.2)       | 3.0<br>(1.2)       | <b>2.6<sup>e</sup></b><br>(1.1) | 2.7<br>(1.1)       | <b>2.5<sup>e</sup></b><br>(1.1)          |
| Motivation           | 2.6<br>(1.4)       | 2.5<br>(1.2)       | 2.6<br>(1.3)                    | 2.5<br>(1.2)      | 2.7<br>(1.2)                            | 2.6<br>(1.4)       | 2.7<br>(1.2)       | 2.5<br>(1.3)                    | 2.7<br>(1.3)       | 2.6<br>(1.3)                             |
| Weekly training load | 3612.5<br>(1637.5) | 4300.6<br>(1089.9) | 3971.1<br>(1754.5)              | 3716.1<br>(978.1) | <b>2689.4<sup>abcd</sup></b><br>(980.4) | 4051.6<br>(1003.9) | 3587.7<br>(1119.3) | 3741.4<br>(1754.3)              | 3315.6<br>(2563.4) | <b>2695.6<sup>abcd</sup></b><br>(1442.9) |

a &lt; 0.05 vs Week 2; b &lt; 0.05 vs Week 3; c &lt; 0.05 vs Week 4; d &lt; 0.05 vs Week 6; e &lt; 0.05 vs Week 7; f &lt; 0.05 vs Week 8.

**Table S2.** Objective load monitoring variables on *OwnUrGoal* across 10 weeks.

| Variable                | Week 1          | Week 2                               | Week 3                               | Week 4                              | Week 5                              | Week 6                            | Week 7                                | Week 8                                | Week 9                              | Week 10                               |
|-------------------------|-----------------|--------------------------------------|--------------------------------------|-------------------------------------|-------------------------------------|-----------------------------------|---------------------------------------|---------------------------------------|-------------------------------------|---------------------------------------|
| Session duration (mins) | 97.9<br>(21.2)  | 104.6<br>(13.8)                      | 111.2<br>(12.6)                      | <b>94.6<sup>bceh</sup></b><br>(7.1) | 107.3<br>(13.5)                     | <b>95.8<sup>c</sup></b><br>(16.9) | 107.3<br>(23.9)                       | 107.1<br>(16.6)                       | 97.4<br>(26.1)                      | <b>87.9<sup>bcegh</sup></b><br>(22.6) |
| TRIMP.mod               | 133.0<br>(89.7) | 160.8<br>(91.9)                      | <b>215.1<sup>af</sup></b><br>(53.6)  | 154.3<br>(65.6)                     | <b>210.7<sup>af</sup></b><br>(86.8) | 131.2<br>(71.8)                   | <b>227.6<sup>af</sup></b><br>(111.6)  | <b>243.1<sup>af</sup></b><br>(88.8)   | <b>208.9<sup>af</sup></b><br>(74.9) | <b>201.4<sup>af</sup></b><br>(87.8)   |
| TRIMP.mod/min           | 1.3<br>(0.7)    | 1.5<br>(0.7)                         | <b>1.9<sup>abf</sup></b><br>(0.4)    | 1.6<br>(0.6)                        | <b>1.9<sup>af</sup></b><br>(0.7)    | 1.4<br>(0.7)                      | <b>2.0<sup>abf</sup></b><br>(0.7)     | <b>2.3<sup>abdf</sup></b><br>(0.8)    | <b>2.2<sup>abdf</sup></b><br>(0.5)  | <b>2.3<sup>abdf</sup></b><br>(0.7)    |
| Max HR (bpm)            | 189.0<br>(7.0)  | 190.6<br>(7.9)                       | <b>197.6<sup>f</sup></b><br>(7.4)    | 191.2<br>(9.0)                      | <b>192.8<sup>f</sup></b><br>(8.2)   | 181.5<br>(13.4)                   | <b>199.1<sup>f</sup></b><br>(11.1)    | <b>196.1<sup>f</sup></b><br>(10.2)    | 191.1<br>(13.0)                     | <b>194.7<sup>f</sup></b><br>(9.1)     |
| Avg. HR (bpm)           | 144.1<br>(10.1) | 145.7<br>(8.4)                       | <b>155.3<sup>abdf</sup></b><br>(5.8) | 148.8<br>(6.9)                      | <b>153.6<sup>abf</sup></b><br>(9.8) | 140.7<br>(13.0)                   | <b>157.9<sup>abdf</sup></b><br>(14.8) | <b>160.6<sup>abdf</sup></b><br>(11.6) | <b>153.2<sup>abf</sup></b><br>(8.9) | <b>158.7<sup>abdf</sup></b><br>(8.4)  |
| PL/Min. (AU)            | 79.0<br>(9.7)   | <b>69.8<sup>achi</sup></b><br>(10.5) | 85.1<br>(12.9)                       | <b>77.4<sup>i</sup></b><br>(8.8)    | <b>76.5<sup>i</sup></b><br>(13.3)   | <b>74.1<sup>i</sup></b><br>(11.5) | <b>77.9<sup>i</sup></b><br>(11.0)     | 79.9<br>(10.0)                        | <b>91.3<sup>ah</sup></b><br>(11.2)  | <b>71.7<sup>achi</sup></b><br>(7.7)   |

TRIMP.mod = Training impulse modified; HR = Heart rate; PL/Min. = PlayerLoad/minute; a &lt; 0.05 vs Week 1; b &lt; 0.05 vs Week 2; c &lt; 0.05 vs Week 3; d &lt; 0.05 vs Week 4; e &lt; 0.05 vs Week 5; f &lt; 0.05 vs Week 6; g &lt; 0.05 vs Week 7; h &lt; 0.05 vs Week 8; i &lt; 0.05 vs Week 9.

**Table S3.** Countermovement jump outcome variables across 10 weeks.

10

| Variable                     | Week 1                                      | Week 2             | Week 3                                       | Week 4                                       | Week 5            | Week 6             | Week 7             | Week 8             | Week 9             | Week 10                                      |
|------------------------------|---------------------------------------------|--------------------|----------------------------------------------|----------------------------------------------|-------------------|--------------------|--------------------|--------------------|--------------------|----------------------------------------------|
| JH (cm)                      | 22.1<br>(3.3)                               | 19.1<br>(3.9)      | 20.8<br>(3.6)                                | 20.5<br>(3.6)                                | 20.2<br>(4.8)     | 18.6<br>(3.9)      | 20.1<br>(3.7)      | 19.3<br>(4.6)      | 20.1<br>(4.7)      | 20.2<br>(3.6)                                |
| ToV (ms)                     | 2.1<br>(0.2)                                | 1.9<br>(0.2)       | 2.0<br>(0.2)                                 | 2.0<br>(0.2)                                 | 2.0<br>(0.2)      | 1.9<br>(0.2)       | 2.0<br>(0.2)       | 1.9<br>(0.2)       | 2.0<br>(0.2)       | 2.0<br>(0.2)                                 |
| FT (s)                       | 0.4<br>( $< 0.1$ )                          | 0.4<br>( $< 0.1$ ) | 0.4<br>( $< 0.1$ )                           | 0.4<br>( $< 0.1$ )                           | 0.4<br>(0.1)      | 0.4<br>( $< 0.1$ )                           |
| CT (s)                       | 0.7<br>(0.2)                                | 0.7<br>(0.1)       | 0.6<br>(0.1)                                 | 0.7<br>(0.1)                                 | 0.7<br>(0.1)      | 0.7<br>(0.1)       | 0.6<br>(0.1)       | 0.6<br>(0.1)       | 0.6<br>(0.1)       | 0.7<br>(0.1)                                 |
| RSI.M                        | 0.3<br>(0.1)                                | 0.3<br>(0.1)       | 0.3<br>(0.1)                                 | 0.3<br>(0.1)                                 | 0.3<br>(0.1)      | 0.2<br>(0.1)       | 0.3<br>( $< 0.1$ ) | 0.3<br>(0.1)       | 0.3<br>(0.1)       | 0.3<br>(0.1)                                 |
| A.PF (N)                     | 1709.7<br>(398.5)                           | 1668.3<br>(322.8)  | 1776.2<br>(361.9)                            | 1751.3<br>(285.3)                            | 1701.5<br>(297.3) | 1664.6<br>(328.9)  | 1733.3<br>(283.0)  | 1664.8<br>(327.4)  | 1721.7<br>(367.1)  | 1736.9<br>(326.4)                            |
| R.PF (N.kg. <sup>-1</sup> )  | 23.9<br>(3.1)                               | 23.0<br>(2.3)      | 24.6<br>(2.5)                                | 24.0<br>(2.3)                                | 23.4<br>(2.9)     | 23.2<br>(1.9)      | 23.7<br>(2.1)      | 23.1<br>(2.4)      | 23.7<br>(3.0)      | 23.8<br>(2.6)                                |
| A.PLF (N)                    | 2401.0<br>(501.3)                           | 2402.2<br>(712.9)  | 2402.3<br>(705.7)                            | 2449.8<br>(833.2)                            | 2362.8<br>(654.1) | 2127.4<br>(618.1)  | 2409.0<br>(761.8)  | 2375.1<br>(765.8)  | 2305.5<br>(734.0)  | 2381.6<br>(802.7)                            |
| R.PLF (N.kg. <sup>-1</sup> ) | 33.7<br>(4.0)                               | 32.9<br>(6.6)      | 33.0<br>(5.6)                                | 33.0<br>(7.5)                                | 32.2<br>(6.8)     | 29.4<br>(4.1)      | 32.6<br>(7.8)      | 32.7<br>(7.2)      | 31.4<br>(6.9)      | 32.2<br>(7.2)                                |
| A.PP (W)                     | 3213.9<br>(808.3)                           | 3154.4<br>(791.5)  | <b>3267.7<sup>ab</sup></b><br><b>(701.2)</b> | <b>3224.5<sup>ab</sup></b><br><b>(796.8)</b> | 3142.5<br>(716.4) | 3064.1<br>(778.2)  | 3177.4<br>(756.5)  | 3156.7<br>(729.1)  | 3174.8<br>(788.2)  | <b>3225.2<sup>ab</sup></b><br><b>(820.5)</b> |
| R.PP (W.kg)                  | 44.7<br>(4.7)                               | 43.3<br>(5.3)      | 45.2<br>(3.8)                                | 43.8<br>(5.7)                                | 42.9<br>(5.4)     | 42.1<br>(4.7)      | 43.2<br>(5.1)      | 44.0<br>(8.5)      | 43.5<br>(6.6)      | 44.0<br>(5.9)                                |
| Ecc. AP (W)                  | -362.0<br>(106.0)                           | -392.8<br>(84.6)   | -371.0<br>(87.9)                             | -392.8<br>(103.1)                            | -392.8<br>(97.4)  | -359.4<br>(101.9)  | -385.3<br>(71.7)   | -388.4<br>(93.1)   | -393.9<br>(101.9)  | -387.7<br>(91.9)                             |
| Con. AP (W)                  | <b>1975.2<sup>b</sup></b><br><b>(484.6)</b> | 1885.0<br>(422.0)  | <b>2020.8<sup>b</sup></b><br><b>(423.8)</b>  | <b>1937.7<sup>b</sup></b><br><b>(409.5)</b>  | 1853.2<br>(364.7) | 1766.9<br>(333.0)  | 1906.8<br>(370.6)  | 1884.1<br>(402.6)  | 1878.2<br>(408.5)  | <b>1907.8<sup>b</sup></b><br><b>(401.3)</b>  |

JH = jump height, ToV = take-off velocity; FT = flight time; CT = contact time; RSI.M = RSI Mod; A.PF = absolute peak force; R.PF = relative peak force; A.PLF = absolute peak landing force; R.PLF = relative peak landing force; A.PP = absolute peak power; R.PP = relative peak power; Ecc. AP = eccentric average power; Con. AP = concentric average power; a  $< 0.05$  vs Week 5 ; b  $< 0.05$  vs Week 6.

11

12

13

14

15

16

**Table S4.** Countermovement jump impulse variables across 10 weeks.

17

| Variable             | Week 1           | Week 2          | Week 3          | Week 4          | Week 5          | Week 6           | Week 7                                 | Week 8          | Week 9                                 | Week 10                                |
|----------------------|------------------|-----------------|-----------------|-----------------|-----------------|------------------|----------------------------------------|-----------------|----------------------------------------|----------------------------------------|
| UW Imp. (Ns.kg-1)    | -1.1<br>(0.2)    | -1.1<br>(0.1)   | -1.1<br>(0.2)   | -1.1<br>(0.2)   | -1.1<br>(0.3)   | -1.1<br>(0.2)    | -1.1<br>(0.2)                          | -1.1<br>(0.3)   | -1.1<br>(0.2)                          | -1.2<br>(0.2)                          |
| STR Imp. (Ns.kg-1)   | 1.1<br>(0.2)     | 1.1<br>(0.1)    | 1.1<br>(0.2)    | 1.1<br>(0.2)    | 1.1<br>(0.2)    | 1.0<br>(0.2)     | 1.1<br>(0.2)                           | 1.1<br>(0.3)    | 1.1<br>(0.2)                           | <b>1.2<sup>b</sup></b><br><b>(0.2)</b> |
| NI (Ns.kg-1)         | 2.4<br>(0.2)     | 2.4<br>(0.2)    | 2.4<br>(0.2)    | 2.3<br>(0.1)    | 2.4<br>(0.3)    | 2.4<br>(0.2)     | <b>2.3<sup>a</sup></b><br><b>(0.2)</b> | 2.4<br>(0.3)    | <b>2.4<sup>a</sup></b><br><b>(0.2)</b> | <b>2.4<sup>a</sup></b><br><b>(0.2)</b> |
| PA-I Imp. (Ns.kg-1)  | 2.5<br>(0.2)     | 2.5<br>(0.2)    | 2.5<br>(0.2)    | 2.5<br>(0.2)    | 2.5<br>(0.3)    | 2.4<br>(0.2)     | 2.4<br>(0.2)                           | 2.5<br>(0.3)    | 2.4<br>(0.2)                           | 2.4<br>(0.2)                           |
| PA-II Imp. (Ns.kg-1) | 0.1<br>(0.1)     | 0.1<br>(0.1)    | 0.1<br>(0.1)    | 0.1<br>(0.1)    | 0.1<br>(0.1)    | 0.1<br>(0.0)     | 0.1<br>(0.1)                           | 0.1<br>(0.0)    | 0.1<br>(0.1)                           | 0.1<br>(0.1)                           |
| PD Imp. (Ns.kg-1)    | -0.4<br>(0.1)    | -0.5<br>(0.1)   | -0.4<br>(0.1)   | -0.4<br>(0.1)   | -0.4<br>(0.1)   | -0.4<br>(0.1)    | -0.4<br>(0.1)                          | -0.5<br>(0.2)   | -0.4<br>(0.1)                          | -0.4<br>(0.1)                          |
| UW Dur. (ms)         | 382.4<br>(146.9) | 316.7<br>(54.6) | 324.9<br>(98.9) | 313.9<br>(49.7) | 324.9<br>(70.9) | 334.9<br>(101.5) | 304.3<br>(37.1)                        | 325.8<br>(56.3) | 307.9<br>(59.6)                        | 328.9<br>(68.8)                        |
| STR Dur. (ms)        | 153.4<br>(35.7)  | 160.6<br>(31.0) | 147.8<br>(34.0) | 154.4<br>(40.5) | 173.9<br>(46.7) | 164.0<br>(34.9)  | 158.8<br>(36.4)                        | 165.5<br>(30.9) | 163.9<br>(41.9)                        | 151.2<br>(38.0)                        |
| NI Dur. (ms)         | 206.9<br>(33.9)  | 219.6<br>(37.0) | 197.4<br>(40.5) | 201.2<br>(38.2) | 222.9<br>(53.1) | 212.8<br>(34.3)  | 204.7<br>(35.6)                        | 216.4<br>(34.0) | 215.5<br>(50.9)                        | 209.8<br>(45.2)                        |
| PA-I Dur. (ms)       | 227.5<br>(38.2)  | 232.0<br>(35.4) | 211.2<br>(31.7) | 226.4<br>(42.9) | 238.1<br>(51.5) | 225.5<br>(31.5)  | 222.8<br>(37.5)                        | 231.5<br>(32.1) | 232.3<br>(48.3)                        | 227.8<br>(38.9)                        |
| PA-II Dur. (ms)      | 20.5<br>(10.5)   | 12.4<br>(8.8)   | 13.8<br>(11.8)  | 16.9<br>(12.7)  | 15.2<br>(10.6)  | 12.7<br>(8.7)    | 18.2<br>(10.5)                         | 15.2<br>(8.2)   | 16.9<br>(8.3)                          | 18.0<br>(13.1)                         |
| PD Dur. (ms)         | 61.9<br>(8.9)    | 69.2<br>(6.7)   | 62.9<br>(7.7)   | 60.2<br>(7.3)   | 61.8<br>(6.1)   | 64.7<br>(5.7)    | 60.2<br>(5.9)                          | 69.2<br>(13.8)  | 62.5<br>(8.2)                          | 63.6<br>(9.9)                          |

Imp. = impulse; Dur. = duration; UW = Unweighted phase; STR = Stretching phase; NI = Net impulse phase; PA-I = 18  
 Propulsion acceleration I phase; PA-II = Propulsion acceleration II phase; PD = Propulsion deceleration; a < 0.05 vs Week 19  
 3; b < 0.05 vs Week 6. 20

21

22

**Table S5.** Isometric mid-thigh pull performance outcome variables across 10 weeks.

23

| Variable              | Week 1                 | Week 2                 | Week 3   | Week 4   | Week 5                     | Week 6                 | Week 7   | Week 8                    | Week 9                    | Week 10                    |
|-----------------------|------------------------|------------------------|----------|----------|----------------------------|------------------------|----------|---------------------------|---------------------------|----------------------------|
| Mass                  | 66.7                   | 69.4                   | 68.0     | 67.6     | 66.0                       | 67.5                   | 70.8     | 66.4                      | 66.9                      | 63.9                       |
| (kg)                  | (15.3)                 | (12.0)                 | (15.6)   | (10.6)   | (13.9)                     | (16.6)                 | (17.1)   | (16.4)                    | (12.1)                    | (12.9)                     |
| A.PF                  | 1634.9                 | 1683.7                 | 1616.3   | 1674.3   | 1633.2                     | 1672.9                 | 1628.4   | 1629.6                    | 1617.6                    | 1702.7                     |
| (N)                   | (281.0)                | (224.4)                | (248.7)  | (271.7)  | (323.0)                    | (295.1)                | (274.2)  | (295.8)                   | (297.3)                   | (262.0)                    |
| R.PF                  | 25.2                   | 24.6                   | 24.3     | 25.0     | 25.4                       | 25.7                   | 25.6     | 25.7                      | 24.6                      | 27.1                       |
| (N.kg <sup>-1</sup> ) | (4.6)                  | (2.8)                  | (3.3)    | (3.8)    | (5.9)                      | (6.6)                  | (4.1)    | (6.9)                     | (4.9)                     | (4.6)                      |
| PF.D                  | 2578.7                 | 2476.8                 | 2022.6   | 1843.6   | 2417.4                     | 2695.0                 | 2023.8   | 1800.5                    | 2323.5                    | 2279.3                     |
| (ms)                  | (1173.2)               | (1291.2)               | (1053.4) | (1359.3) | (1269.7)                   | (961.0)                | (888.6)  | (1127.0)                  | (1141.7)                  | (1173.2)                   |
| RFD.30                | 21879.2                | 11365.7                | 22149.8  | 21890.0  | 21276.1                    | 21586.4                | 23025.0  | 21352.3                   | 21298.5                   | 20748.6                    |
| (N.s <sup>-1</sup> )  | (5085.1)               | (3863.2)               | (5068.7) | (3661.1) | (4726.6)                   | (5505.4)               | (5803.3) | (5423.2)                  | (4126.4)                  | (4276.8)                   |
| RFD.50                | 13110.5                | 13430.0                | 13294.4  | 13183.0  | 12766.2                    | 12947.6                | 13803.3  | 12805.1                   | 12786.6                   | 12452.0                    |
| (N.s <sup>-1</sup> )  | (3051.0)               | (2301.6)               | (3044.3) | (2250.0) | (2797.7)                   | 3274.6)                | (3497.5) | (3229.1)                  | (2467.1)                  | (2625.3)                   |
| RFD.90                | 7260.1                 | 7489.3                 | 7386.2   | 73626.5  | 7094.4                     | 7197.1                 | 7664.3   | 7129.0                    | 7104.0                    | 6918.5                     |
| (N.s <sup>-1</sup> )  | (1688.9)               | (1268.2)               | (1686.1) | (1193.3) | (1518.5)                   | (1795.6)               | (1964.2) | (1776.1)                  | (1368.9)                  | (1454.8)                   |
| RFD.100               | 6532.7                 | 6750.9                 | 6646.7   | 6624.8   | 6383.3                     | 4679.1                 | 6897.4   | 6422.9                    | 6392.2                    | 6226.8                     |
| (N.s <sup>-1</sup> )  | (1520.2)               | (1140.6)               | (1515.6) | (1057.4) | (1358.7)                   | (1613.7)               | (1770.4) | (1595.9)                  | (1231.2)                  | (1308.6)                   |
| RFD.150               | 4351.6                 | 4546.1                 | 4429.3   | 4407.5   | 4250.5                     | 4323.1                 | 4596.3   | 4294.9                    | 4253.9                    | 4150.7                     |
| (N.s <sup>-1</sup> )  | (1018.5)               | (764.8)                | (764.8)  | (1008.4) | (671.3)                    | (883.7)                | (1067.2) | (1178.9)                  | (1059.7)                  | (813.0)                    |
| RFD.200               | 3254.8                 | 3430.8                 | 3321.9   | 3336.9   | 3186.9                     | 3239.5                 | 3455.8   | 3208.2                    | 3189.2                    | 3110.0                     |
| (N.s <sup>-1</sup> )  | (765.8)                | (585.6)                | (760.92) | (558.6)  | (677.7)                    | (795.6)                | (879.07) | (797.3)                   | (606.0)                   | (629.4)                    |
| RFD.250               | 2608.1                 | 2742.6                 | 2658.3   | 2964.0   | <b>2552.0<sup>ab</sup></b> | 2593.7                 | 2776.8   | <b>2541.4<sup>b</sup></b> | <b>2551.6<sup>b</sup></b> | <b>2476.4<sup>ab</sup></b> |
| (N.s <sup>-1</sup> )  | (619.7)                | (472.7)                | (609.1)  | (762.2)  | <b>(560.9)</b>             | (632.1)                | (710.4)  | <b>(642.9)</b>            | <b>(491.2)</b>            | <b>(496.9)</b>             |
| pRFD                  | 852.9                  | 81.0                   | 1134.2   | 2111.9   | 1041.8                     | 694.5                  | 1060.0   | 1347.1                    | 1068.5                    | 953.1                      |
| (N.s <sup>-1</sup> )  | (669.4)                | (481.4)                | (890.1)  | (2004.5) | (1059.6)                   | (264.8)                | (767.4)  | (1147.4)                  | (1008.3)                  | (417.5)                    |
| I.100                 | <b>0.2<sup>b</sup></b> | <b>0.2<sup>b</sup></b> | 0.2      | 0.4      | <b>0.2<sup>b</sup></b>     | <b>0.1<sup>b</sup></b> | 0.2      | 0.2                       | 0.2                       | <b>0.2<sup>b</sup></b>     |
| (N.s <sup>-1</sup> )  | <b>(0.1)</b>           | <b>(0.1)</b>           | (0.1)    | (0.3)    | <b>(0.1)</b>               | <b>(0.1)</b>           | (0.1)    | (0.1)                     | (0.2)                     | <b>(0.1)</b>               |
| I.250                 | 1.0                    | 1.0                    | 1.0      | 1.6      | 1.0                        | 1.0                    | 1.1      | 1.2                       | 1.1                       | 1.1                        |
| (N.s <sup>-1</sup> )  | (0.5)                  | (0.3)                  | (0.4)    | (1.1)    | (0.3)                      | (0.5)                  | (0.4)    | (0.6)                     | (0.6)                     | (0.6)                      |
| PF.I                  | 33.9                   | 28.3                   | 24.3     | 23.5     | 33.2                       | 34.4                   | 22.3     | 24.1                      | 29.1                      | 32.1                       |
| (N.s <sup>-1</sup> )  | (20.7)                 | (15.1)                 | (15.0)   | (18.7)   | (27.3)                     | (17.1)                 | (11.4)   | (17.3)                    | (15.6)                    | (25.6)                     |

A.PF = absolute peak force; R.PF = relative peak force; PF.D = peak force duration; RFD.30 = rate of force development from onset to 30ms; RFD.50 = rate of force development from onset to 50ms; RFD.90 = rate of force development from onset to 90ms; RFD.100 = rate of force development from onset to 100ms; RFD.150 = rate of force development from onset to 150ms; RFD.200 = rate of force development from onset to 200ms; RFD.250 = rate of force development from onset to 250ms; pRFD = peak rate of force development; I.100 = impulse from onset to 100ms; I.250 = impulse from onset to 250ms; PF.I = peak force impulse. a < 0.05 vs Week 2; b < 0.05 vs Week 4

24  
25  
26  
27  
28  
29  
30

**Table S6.** Performance testing correlations.

|           |                | JH (cm) | A.PF (N) | PF.D (ms) |
|-----------|----------------|---------|----------|-----------|
| JH (cm)   | r <sup>2</sup> | 1       | .306*    | .118      |
|           | Sig.           |         | .001     | .192      |
| A.PF (N)  | r <sup>2</sup> |         | 1        | .223*     |
|           | Sig.           |         |          | .012      |
| PF.D (ms) | r <sup>2</sup> |         |          | 1         |
|           | Sig.           |         |          |           |

JH = Jump height; A.PF = Absolute peak force; PF.D = Peak force duration; r<sup>2</sup> = Pearson Correlation; Sig. = Significance (2 tailed); \* < 0.05.

**Table S7.** Correlations between athlete monitoring methods

|                |                | Wellness Score | WTL.Total | JH (cm) | A.PF (N) | TRIMP.Mod/Min | PL/Min. (AU) |
|----------------|----------------|----------------|-----------|---------|----------|---------------|--------------|
| Wellness Score | r <sup>2</sup> | 1              | -.137     | .049    | .020     | .222*         | -.078        |
|                | Sig.           |                | .107      | .584    | .822     | .013          | .379         |
| WTL.Total      | r <sup>2</sup> |                | 1         | -.184*  | -.236*   | -.080         | .025         |
|                | Sig.           |                |           | .038    | .008     | .375          | .780         |
| JH (cm)        | r <sup>2</sup> |                |           | 1       | .306*    | -.119         | -.038        |
|                | Sig.           |                |           |         | .001     | .197          | .676         |
| A.PF (N)       | r <sup>2</sup> |                |           |         | 1        | -.169         | -.280*       |
|                | Sig.           |                |           |         |          | .065          | .002         |
| TRIMP.Mod/Min  | r <sup>2</sup> |                |           |         |          | 1             | .275*        |
|                | Sig.           |                |           |         |          |               | .002         |
| PL/Min. (AU)   | r <sup>2</sup> |                |           |         |          |               | 1            |
|                | Sig.           |                |           |         |          |               |              |

WTL.Total = Weekly training load total; JH = Jump height; A.PF = Absolute peak force; TRIMP.Mod/Min = Training impulse modified/minute; PL/Min = PlayerLoad/minute; r<sup>2</sup> = Pearson Correlation; Sig. = Significance (2 tailed); \* < 0.05.

**Table S8.** Correlations between *OwnUrGoal* wellness variables and other athlete monitoring methods

|                 |                | WTL.Total | JH (cm) | A.PF (N) | TRIMP.Mod/Min | PL/Min. (AU) |
|-----------------|----------------|-----------|---------|----------|---------------|--------------|
| Muscle Soreness | r <sup>2</sup> | -.153     | .284*   | .006     | .020          | .123         |
|                 | Sig.           | .072      | .001    | .947     | .823          | .167         |
| Fatigue         | r <sup>2</sup> | -.026     | -.032   | -.016    | .290*         | -.010        |
|                 | Sig.           | .756      | .724    | .855     | .001          | .908         |
| Sleep Quality   | r <sup>2</sup> | -.172*    | -.084   | .021     | .201*         | -.105        |
|                 | Sig.           | .043      | .347    | .816     | .024          | .236         |
| Hours Slept     | r <sup>2</sup> | .094      | .128    | -.077    | -.101         | .101         |
|                 | Sig.           | .267      | .152    | .389     | .262          | .256         |
| Stress          | r <sup>2</sup> | .014      | -.033   | -.040    | .154          | -.079        |
|                 | Sig.           | .874      | .711    | .659     | .085          | .373         |
| Motivation      | r <sup>2</sup> | -.235*    | .102    | .118     | .182*         | -.207*       |
|                 | Sig.           | .005      | .256    | .186     | .042          | .019         |

WTL.Total = Weekly training load total; JH = Jump height; A.PF = Absolute peak force; TRIMP.Mod/Min = Training impulse modified/minute; PL/Min = PlayerLoad/minute; r<sup>2</sup> = Pearson Correlation; Sig. = Significance (2 tailed); \* < 0.05.
